# Supplementary material for: Genetic networks in Parkinson’s and Alzheimer’s disease
Source: Aging (Albany NY). 2020 Mar 23;12(6):5221–43. doi: 10.18632/aging.102943 (PMC7138567; doi:10.18632/aging.102943)
Supplement: Supplementary Table 2 [file aging-12-102943-s002..csv]

Gene	logFC	AveExpr	t	P.Value	adj.P.Val	B	FC
CYBC1	0.162619083	8.504248932	4.826183906	1.98E-06	0.037970644	4.401143779	1.119317315
PPP4C	0.150430093	8.733783858	4.546476087	7.23E-06	0.069311474	3.293147902	1.109900304
PTGDS	0.268823315	6.707755255	4.30415503	2.11E-05	0.121148673	2.381021392	1.204824752
TNFRSF9	0.214824402	5.72455352	4.251320121	2.65E-05	0.121148673	2.188117367	1.160562648
RAB24	0.180672471	8.849910355	4.13795037	4.27E-05	0.121148673	1.781483764	1.13341207
KIAA0319L	0.158405031	6.879542098	4.129559153	4.42E-05	0.121148673	1.751782982	1.116052605
PUM3	-0.134428879	5.786498541	-4.129558241	4.42E-05	0.121148673	1.751779754	0.911030413
GNA12	-0.195250754	7.177179116	-4.061928564	5.85E-05	0.140286087	1.514409082	0.873421074
LOC101928429	0.238776196	5.551098752	3.981879828	8.12E-05	0.172880921	1.238075842	1.179991278
LPAR2	0.14357724	7.033943965	3.881721557	0.000121209	0.232394715	0.899425966	1.104640739
P2RX1	0.182892528	7.636035818	3.822441933	0.000153084	0.255123721	0.702731494	1.135157536
CEACAM21	0.206047618	6.75464178	3.809299874	0.000161152	0.255123721	0.659502978	1.153523678
NBEAL2	0.180268378	8.164860884	3.789115713	0.000174328	0.255123721	0.59337828	1.13309465
TYMP	0.224241712	7.68035148	3.772002534	0.00018629	0.255123721	0.537568506	1.168163094
PSMB3	0.12629363	10.21051343	3.731342047	0.00021789	0.268965843	0.405902842	1.091486003
PSTPIP1	0.129559027	8.060780829	3.723598691	0.000224454	0.268965843	0.380978222	1.093959271
NIPA1	-0.148590934	4.414238395	-3.701001457	0.000244691	0.275968003	0.308515586	0.902131135
DARS2	-0.110573782	4.397018765	-3.672439441	0.000272731	0.288660687	0.217510828	0.926219617
EFHD2	0.122597426	9.515229115	3.653880762	0.000292542	0.288660687	0.158729568	1.08869318
SH2D3C	0.169292749	5.973722987	3.64621714	0.000301112	0.288660687	0.134537112	1.124507083
DYNLL2	-0.129694626	3.860864824	-3.616614239	0.000336479	0.302941857	0.041530333	0.9140249
TYROBP	0.130855525	11.50352336	3.607901147	0.00034761	0.302941857	0.014289735	1.094942815
ADGRG3	0.25837867	7.840099395	3.587241726	0.000375399	0.312935572	-0.05005544	1.196133709
BLACAT1	-0.105026193	3.085582911	-3.549556162	0.000431533	0.34193412	-0.166542928	0.929788062
PDLIM7	0.17396153	7.066063785	3.54067959	0.000445854	0.34193412	-0.193813834	1.128152054
CYBA	0.116418415	10.82219016	3.517779492	0.000484883	0.34375966	-0.263874025	1.084040318
OPA3	0.119088854	4.549153298	3.470011399	0.000576808	0.34375966	-0.408647783	1.086048743
SIPA1	0.10336055	8.118068075	3.454855431	0.000609222	0.34375966	-0.454195043	1.074272914
FAM50B	-0.103028596	5.877347772	-3.45047087	0.000618912	0.34375966	-0.467336882	0.931076365
RAB37	0.107131099	8.075191235	3.440879066	0.000640614	0.34375966	-0.496031898	1.077084247
LYZL4	-0.106276923	4.698796219	-3.440527753	0.000641422	0.34375966	-0.497081471	0.928982341
VPS16	0.099406052	7.238850173	3.44039776	0.000641721	0.34375966	-0.49746981	1.071332312
CD300A	0.145388495	8.665329978	3.418127431	0.000694964	0.34375966	-0.563796824	1.106028449
DHRSX	0.142525053	5.507250992	3.41567513	0.000701072	0.34375966	-0.571075758	1.103835395
SMIM12	-0.087458911	4.253567733	-3.412663034	0.000708644	0.34375966	-0.58000958	0.941179034
LILRB1	0.114201749	7.315992836	3.412348667	0.000709438	0.34375966	-0.580941561	1.082375995
PRKCZ	0.102931574	6.74577687	3.409834268	0.000715823	0.34375966	-0.588392918	1.073953533
NADSYN1	0.110284985	7.489142391	3.408113124	0.000720225	0.34375966	-0.593490515	1.079441445
DLGAP4-AS1	-0.096406955	3.885025446	-3.406884459	0.000723382	0.34375966	-0.597128037	0.935359615
RNF24	0.165795738	9.470723762	3.406080758	0.000725455	0.34375966	-0.599506769	1.121784643
RNF187	-0.122671922	8.144741291	-3.393225241	0.000759366	0.34375966	-0.637483943	0.918485008
RNF130	0.152319372	6.82922764	3.391107444	0.000765092	0.34375966	-0.643727316	1.111354724
CST7	0.196965729	9.662066408	3.388951479	0.000770963	0.34375966	-0.650079453	1.146284956
TCIRG1	0.138738003	9.175471072	3.379556355	0.000797039	0.347309672	-0.677716119	1.100941646
DGAT1	0.120111394	6.717279731	3.345067353	0.000899972	0.361311659	-0.778551037	1.086818775
TMEM222	0.105418129	7.159074139	3.334644679	0.000933433	0.361311659	-0.808832363	1.075806141
CHST9	-0.072635177	2.511037376	-3.332442511	0.000940649	0.361311659	-0.815219023	0.950899531
PITHD1	-0.22911235	8.980549364	-3.32664502	0.000959896	0.361311659	-0.832013752	0.853159656
S100A11	0.123947442	11.57461181	3.325272048	0.000964507	0.361311659	-0.83598708	1.089712413
LILRB3	0.129534364	9.728733425	3.323597913	0.000970158	0.361311659	-0.840829875	1.093940571
SPI1	0.141450196	8.255920053	3.319192095	0.000985176	0.361311659	-0.853563689	1.103013307
PHKG2	0.0982573	6.440848807	3.317905369	0.000989602	0.361311659	-0.857279619	1.070479598
PCAT19	-0.08332633	4.17037856	-3.315255997	0.000998775	0.361311659	-0.86492646	0.943878895
IER2	0.093344826	10.61541511	3.302442044	0.001044266	0.364292329	-0.90183003	1.066840742
MMP9	0.312553287	9.409104465	3.301268614	0.001048527	0.364292329	-0.905202729	1.241903682
HK3	0.134626547	7.90079201	3.297039718	0.001064016	0.364292329	-0.91734815	1.097808601
ITM2C	-0.106118955	6.803848358	-3.2827879	0.001117793	0.375990263	-0.958171515	0.929084065
RP9P	-0.089836257	6.098668603	-3.276728137	0.001141414	0.376555605	-0.975478814	0.939629389
ZNF652	0.394594561	6.654107521	3.267667257	0.001177599	0.376555605	-1.001301387	1.314573276
LINC00528	0.122901506	6.54565361	3.267471244	0.001178393	0.376555605	-1.00185926	1.088922671
SH2B2	0.126649091	7.503898106	3.262194844	0.001199966	0.3765604	-1.016864552	1.091754964
GPA33	-0.117964285	5.419098629	-3.250621148	0.001248572	0.3765604	-1.049698323	0.921486998
BAG3	-0.182932756	5.821297979	-3.249209785	0.001254623	0.3765604	-1.053694732	0.880910432
LINC00173	0.165225688	7.785469176	3.24686789	0.001264723	0.3765604	-1.060322421	1.121341481
WDFY2	0.164180441	6.526109972	3.244133895	0.001276609	0.3765604	-1.068054069	1.120529352
LRRN3	-0.400622624	6.011316293	-3.230740196	0.001336349	0.388209399	-1.105842206	0.757531285
S100A6	0.121540313	11.40754393	3.219662768	0.001387703	0.393728561	-1.136983864	1.08789575
WDR12	-0.129858324	5.530869478	-3.212243772	0.001423111	0.393728561	-1.1577842	0.913921195
SELENOO	0.145559759	5.575103543	3.210444025	0.001431826	0.393728561	-1.162823248	1.106159755
ENC1	0.247651013	4.301321108	3.20119899	0.001477376	0.393728561	-1.188666036	1.187272431
IFITM3	0.106800838	12.34433683	3.194451204	0.001511464	0.393728561	-1.207483767	1.07683771
NAV2-AS5	-0.085708698	2.573183439	-3.188473115	0.001542269	0.393728561	-1.22412367	0.942321524
C19orf25	0.101273988	6.140990585	3.177103678	0.001602464	0.393728561	-1.255688979	1.072720322
ARL11	0.151506673	7.796190523	3.166108214	0.001662738	0.393728561	-1.286114573	1.110728852
TENT5C	-0.328428439	8.819209618	-3.159351936	0.001700804	0.393728561	-1.304760401	0.796403552
ARHGAP9	0.137463347	8.868721356	3.156882205	0.001714919	0.393728561	-1.311566902	1.099969367
AGTRAP	0.127896239	9.312942914	3.155310248	0.00172396	0.393728561	-1.315896543	1.092699148
EPHX4	-0.074927962	2.493103752	-3.154398711	0.001729222	0.393728561	-1.318406256	0.949389526
ARPC1B	0.086831379	10.21287986	3.154060807	0.001731176	0.393728561	-1.319336422	1.06203505
PSMB10	0.117294395	9.156457775	3.153063629	0.001736956	0.393728561	-1.322080863	1.084698729
GSDMD	0.084614509	7.884578744	3.146154846	0.001777491	0.393728561	-1.341072703	1.060404361
GBAP1	0.101090318	6.971466287	3.145634738	0.001780578	0.393728561	-1.342500852	1.072583762
TPD52L2	0.112901723	8.720039135	3.141841511	0.001803239	0.393728561	-1.352909809	1.081401096
LOC100507507	0.109338835	6.741343183	3.13807734	0.00182599	0.393728561	-1.363227277	1.078733756
ATP6V0B	0.108177028	10.25248251	3.136825064	0.001833617	0.393728561	-1.366657127	1.077865398
HIST1H1T	0.131912441	5.272399847	3.135580052	0.001841229	0.393728561	-1.370065795	1.095745262
PRDM4	-0.092111537	5.047717135	-3.134855894	0.00184567	0.393728561	-1.372047849	0.938148664
VMO1	0.187631484	4.189960848	3.133018007	0.001856986	0.393728561	-1.377076288	1.138892426
DCAF6	-0.163297292	6.936097474	-3.132764288	0.001858553	0.393728561	-1.377770239	0.892981819
RGL2	0.114455929	7.73724599	3.131177906	0.001868379	0.393728561	-1.382107982	1.082566709
MIR181A2HG	0.183151518	5.481454186	3.127933386	0.001888624	0.393728561	-1.390973194	1.135361337
PPM1M	0.094880462	7.973536659	3.124811323	0.001908297	0.393728561	-1.399495587	1.067976915
ILK	0.085240498	9.145712773	3.124572655	0.001909808	0.393728561	-1.400146755	1.060864573
DNAJA4	-0.196248446	6.001311818	-3.117126823	0.001957525	0.397029918	-1.420437859	0.872817271
GCHFR	0.110361955	5.585418351	3.115631733	0.001967237	0.397029918	-1.424506691	1.079499036
SLC9A8	0.110595837	6.84309004	3.10995327	0.002004533	0.397258557	-1.439943562	1.079674053
CHKB	0.106681128	7.631610407	3.109157724	0.00200981	0.397258557	-1.442104118	1.076748361
RGS3	0.099422867	7.205020563	3.10564909	0.002033235	0.397787901	-1.451626665	1.071344798
TYK2	0.093459401	8.41368538	3.097319755	0.002089856	0.400577891	-1.474191929	1.066925471
ZNF594	-0.092319297	4.581351073	-3.091214971	0.002132273	0.400577891	-1.490694092	0.938013573
DGKK	0.114317815	4.227040163	3.086032687	0.002168901	0.400577891	-1.504678363	1.082463077
RGL4	0.186921114	6.164123939	3.08404941	0.002183071	0.400577891	-1.510024298	1.138331784
FAM192A	0.08052786	8.338055799	3.078511424	0.002223091	0.400577891	-1.524934708	1.057404858
UTP25	-0.177700706	4.550021471	-3.076862511	0.002235137	0.400577891	-1.52936931	0.884110925
LIN28B-AS1	-0.09452691	5.062931454	-3.072813977	0.002264967	0.400577891	-1.540247912	0.936579321
NME4	-0.141466734	6.963908051	-3.072075695	0.002270446	0.400577891	-1.542230245	0.906596983
ZNF367	-0.106487376	2.744830227	-3.069636291	0.002288636	0.400577891	-1.548776979	0.928846835
ANKDD1A	0.143983953	4.320519232	3.069392668	0.00229046	0.400577891	-1.549430529	1.104952194
SLC11A1	0.208959649	4.933728596	3.068771678	0.002295116	0.400577891	-1.551096194	1.155854378
PLIN3	0.120106557	8.362296612	3.068359672	0.002298209	0.400577891	-1.552201129	1.086815132
FECH	-0.323732502	6.102256619	-3.059782091	0.002363491	0.401683951	-1.575172869	0.79900005
CR2	-0.136117475	3.290671032	-3.056033047	0.002392555	0.401683951	-1.58519406	0.909964725
PGLYRP1	0.206668985	7.665245055	3.055585806	0.002396044	0.401683951	-1.586388757	1.154020606
GAB3	0.285495418	4.112196724	3.054721518	0.0024028	0.401683951	-1.58869702	1.218828735
RHOG	0.111839402	11.02219934	3.053891126	0.002409308	0.401683951	-1.590914176	1.080605105
KAZALD1	-0.112291258	4.857488561	-3.049618787	0.002443045	0.401831053	-1.60231231	0.925117642
TPGS2	-0.222831713	7.981794637	-3.048480477	0.002452106	0.401831053	-1.605346639	0.856881902
TNS1	-0.34621418	7.870862198	-3.03997889	0.002520767	0.40342446	-1.627974814	0.786645652
TLR6	0.169572846	6.995029117	3.03573342	0.002555711	0.40342446	-1.63925225	1.124725426
GPR55	-0.085840552	3.394397686	-3.029788471	0.002605391	0.40342446	-1.655018921	0.942235405
KCNH2	-0.143802592	6.53045729	-3.02916165	0.002610681	0.40342446	-1.656679609	0.905130306
B3GNTL1	0.133589293	5.89080491	3.028959621	0.002612388	0.40342446	-1.65721479	1.097019593
TMEM120A	0.11949333	7.864540982	3.02863156	0.002615162	0.40342446	-1.658083764	1.086353272
FKBP15	0.11541832	4.555668096	3.028016786	0.002620367	0.40342446	-1.659711945	1.083289108
RNF166	0.13265687	7.532903241	3.025440582	0.002642285	0.40342446	-1.666531409	1.096310812
FFAR1	-0.108220427	4.034275092	-3.021979235	0.002671997	0.40342446	-1.675685244	0.927731719
SCO2	0.163648867	7.683735242	3.019835732	0.002690551	0.40342446	-1.68134893	1.12011656
IGF2BP2	-0.211806875	7.980855438	-3.017138685	0.002714064	0.40342446	-1.688469794	0.863455136
TNFRSF1B	0.09517751	9.590586432	3.015876042	0.002725136	0.40342446	-1.691801401	1.068196832
ST18	-0.094971632	4.150935967	-2.995066263	0.002913689	0.40342446	-1.746518931	0.936290658
CUX1	0.137634142	6.304681212	2.99468125	0.002917287	0.40342446	-1.747527891	1.100099596
FAM193B	0.10283271	7.739668844	2.994008151	0.002923588	0.40342446	-1.749291513	1.073879941
FAM117A	-0.112287373	9.144806883	-2.992869296	0.002934277	0.40342446	-1.752274629	0.925120133
RAB2B	-0.199253798	8.254936096	-2.992399685	0.002938695	0.40342446	-1.753504412	0.871000953
ATP6V0D1	0.103176252	10.71362939	2.991783655	0.0029445	0.40342446	-1.755117347	1.074135689
TREM1	0.183317423	9.717479954	2.9900613	0.002960786	0.40342446	-1.759625271	1.135491907
MX2	0.131084559	9.193657336	2.988944118	0.002971393	0.40342446	-1.762547953	1.095116656
MSRB1	0.123201774	11.47766805	2.988822193	0.002972553	0.40342446	-1.76286686	1.089149332
MYD88	0.089430268	11.20457179	2.985296211	0.003006272	0.40342446	-1.772084075	1.063949937
GCNT7	0.1065019	6.486024982	2.983858993	0.003020117	0.40342446	-1.775838113	1.076614604
USP12	-0.164717853	5.456686693	-2.983485327	0.003023726	0.40342446	-1.776813855	0.89210297
LOC101929963	-0.070014552	3.098820276	-2.981897087	0.00303911	0.40342446	-1.780959867	0.952628389
TPM3	0.135398729	4.958006207	2.98125259	0.003045373	0.40342446	-1.782641691	1.098396344
ABI3BP	0.075428876	2.49481214	2.979474682	0.003062711	0.40342446	-1.787279377	1.05367422
EMP3	0.085953854	10.67129068	2.97936441	0.00306379	0.40342446	-1.787566935	1.061389259
NELL2	-0.20234126	7.626169144	-2.977857492	0.003078561	0.40342446	-1.791495538	0.869138947
FAXDC2	-0.229405713	7.882505845	-2.976383986	0.003093068	0.40342446	-1.795335205	0.852986189
LINC00911	-0.087274021	3.399348165	-2.967020322	0.003186726	0.410979353	-1.819692779	0.94129966
DCTN3	0.075362222	8.277157593	2.960947131	0.003248852	0.410979353	-1.835451806	1.05362554
OSCAR	0.135819419	6.489207391	2.960323183	0.003255297	0.410979353	-1.837069116	1.098716684
CLYBL	-0.112283002	4.884902765	-2.960215939	0.003256406	0.410979353	-1.837347066	0.925122936
SLC14A1	-0.184834246	4.598787974	-2.95840234	0.003275211	0.410979353	-1.842046015	0.879750146
FAM53B-AS1	0.108126473	3.193224414	2.956989295	0.003289932	0.410979353	-1.845705245	1.077827628
STK40	0.10897314	7.79646772	2.955926989	0.003301039	0.410979353	-1.848455101	1.078460352
TRANK1	0.114599314	8.278502186	2.95115814	0.003351323	0.411876731	-1.86078802	1.082674308
LIMD2	0.103454684	7.586769361	2.949844996	0.003365291	0.411876731	-1.864180664	1.074343012
RANBP10	-0.127461155	6.136315782	-2.948300406	0.00338179	0.411876731	-1.868169431	0.915441021
ALDH5A1	-0.229171885	5.206666199	-2.946322512	0.003403024	0.411876731	-1.873274258	0.853124449
IKBKG	0.068597867	7.84707921	2.943888184	0.003429327	0.411876731	-1.879552633	1.048696976
PPP1R10	0.123723925	6.321880232	2.939455427	0.003477699	0.411876731	-1.89097245	1.089543596
SFRP2	-0.154576984	5.612978481	-2.937059996	0.003504098	0.411876731	-1.897136812	0.898395755
MBD6	0.124919618	9.194723907	2.931184083	0.00356963	0.411876731	-1.912237493	1.090446975
MATN2	-0.072058009	3.684816053	-2.927650699	0.003609574	0.411876731	-1.921304156	0.951280026
PLOD1	0.107209207	7.0960696	2.925438859	0.003634785	0.411876731	-1.926974429	1.077142563
LSP1	0.114036396	9.953660976	2.924699256	0.003643251	0.411876731	-1.928869563	1.082251947
BBS12	-0.098396665	3.240182515	-2.923934945	0.003652019	0.411876731	-1.930827528	0.934070492
SECTM1	0.122176478	9.70725404	2.923197234	0.0036605	0.411876731	-1.932716888	1.088375569
PNCK	-0.083084629	5.282094732	-2.921717571	0.003677565	0.411876731	-1.9365051	0.94403704
VPS37B	0.110431348	7.141373137	2.920832324	0.003687809	0.411876731	-1.938770618	1.079550961
USP9X	0.39943835	5.031108423	2.920460247	0.003692122	0.411876731	-1.939722642	1.318994318
HSPA6	0.157326953	8.132664381	2.918754997	0.00371195	0.411876731	-1.944084335	1.115218928
GNB2	0.101638093	9.379611641	2.918401334	0.003716074	0.411876731	-1.944988631	1.072991088
NINJ1	0.128532908	9.367402323	2.918372807	0.003716407	0.411876731	-1.945061568	1.093181468
HCK	0.122896784	10.72345724	2.89652284	0.003979497	0.438499352	-2.000727342	1.088919107
ICAM3	0.114247557	11.2012361	2.894296395	0.004007236	0.439032774	-2.006377095	1.082410363
INSC	0.103451473	2.789676616	2.891683671	0.004040013	0.439651313	-2.01300177	1.07434062
CTDSP1	0.077122688	9.114989495	2.889527156	0.00406725	0.439651313	-2.018465401	1.054912024
CEACAM3	0.121446232	7.753535087	2.888390482	0.004081674	0.439651313	-2.021343653	1.087824808
CALN1	-0.104479811	3.124266866	-2.883067564	0.004149841	0.444496628	-2.03480779	0.93014026
UBC	0.087439097	12.19384161	2.878709553	0.004206421	0.445697767	-2.045813566	1.062482513
CSNK1G2	0.103726446	8.300146785	2.878623364	0.004207547	0.445697767	-2.046031069	1.074545406
BRMS1	0.065928855	7.358611836	2.872789573	0.004284405	0.451345604	-2.060738484	1.046758661
SCGB2A1	-0.065920616	2.473044712	-2.865561388	0.004381406	0.459042042	-2.078921724	0.955335502
HSD11B1	-0.079413594	3.98208608	-2.858083076	0.004483862	0.464864833	-2.097688108	0.946442265
RILPL1	0.120608955	5.870193682	2.857966679	0.004485474	0.464864833	-2.097979828	1.087193665
BASP1	0.145681012	11.67252695	2.854375104	0.004535467	0.465690315	-2.106975662	1.106252727
STX10	0.093440523	7.431947957	2.852973747	0.00455511	0.465690315	-2.110482715	1.06691151
LOC101928673	0.122008372	5.986259513	2.852177522	0.004566306	0.465690315	-2.112474623	1.088248757
IL2RA	-0.093506134	4.590409126	-2.843120057	0.004695431	0.475549688	-2.135096174	0.937242231
PLEKHO2	0.094257744	8.653150311	2.834400055	0.004822871	0.475549688	-2.156809875	1.067516038
KDM6B	0.145111243	6.931953123	2.831776433	0.004861825	0.475549688	-2.163330477	1.105815917
CDON	-0.092565722	3.872622815	-2.830531042	0.004880415	0.475549688	-2.166423679	0.937853365
MPZL3	0.148897947	5.407483089	2.828899517	0.004904867	0.475549688	-2.170473962	1.108722212
CHST2	0.117349946	7.148707523	2.827294448	0.004929032	0.475549688	-2.174456386	1.084740496
CLHC1	-0.076491542	2.487307441	-2.825830564	0.004951164	0.475549688	-2.178086624	0.948361143
TEKT2	-0.105790556	3.710462389	-2.82567882	0.004953464	0.475549688	-2.178462825	0.929295575
KDM7A-DT	-0.163445	6.062809968	-2.822555026	0.005001015	0.475549688	-2.186203003	0.892890397
TRAK2	-0.171702209	7.669149558	-2.82075996	0.005028527	0.475549688	-2.190647136	0.88779457
DENND3	0.152173691	6.203239313	2.820585515	0.005031208	0.475549688	-2.191078874	1.111242507
ADCYAP1R1	-0.11118214	3.777094772	-2.819656652	0.005045505	0.475549688	-2.193377307	0.92582913
CASP4	0.160348669	6.880296931	2.818152141	0.005068741	0.475549688	-2.19709862	1.117557196
LAMTOR4	0.113362673	8.993390385	2.817506597	0.00507874	0.475549688	-2.198694748	1.081746665
PARVG	0.097521294	7.915361111	2.816189875	0.005099192	0.475549688	-2.201949304	1.069933621
REXO2	-0.124560336	7.259636038	-2.816014544	0.00510192	0.475549688	-2.20238256	0.917283544
ARHGEF40	0.20541666	4.601688551	2.810715075	0.005185031	0.475549688	-2.215465805	1.153019298
MGRN1	0.096728711	8.290219756	2.810097397	0.005194797	0.475549688	-2.216989185	1.069345986
LRRC25	0.120600709	8.383842178	2.808666175	0.005217491	0.475549688	-2.220517773	1.087187451
VRK3	0.102394433	6.470854615	2.805486581	0.005268229	0.475549688	-2.228350707	1.073553756
DGAT2	0.145147996	8.527713181	2.80537056	0.005270089	0.475549688	-2.228636364	1.105844088
STAT5B	0.122174011	7.250299882	2.805176153	0.005273206	0.475549688	-2.229114992	1.088373709
PPL	-0.067183832	3.286891972	-2.804794547	0.005279331	0.475549688	-2.230054409	0.954499381
TSC22D4	0.128997899	7.355842922	2.804231163	0.005288385	0.475549688	-2.231441092	1.093533865
COL11A1	-0.07891138	2.49037336	-2.795858994	0.005424601	0.475549688	-2.25201647	0.946771787
URB1	-0.091813842	4.042932458	-2.794045618	0.00545452	0.475549688	-2.256465248	0.938342268
DYSF	0.155229705	9.451653479	2.793466871	0.005464101	0.475549688	-2.257884512	1.113598911
MYLK4	-0.076920354	3.191397906	-2.792348042	0.005482665	0.475549688	-2.260627425	0.948079303
CEP41	-0.122435319	3.555183007	-2.791999035	0.005488467	0.475549688	-2.261482833	0.918635653
ZNF717	-0.08265774	4.780686326	-2.790831194	0.005507924	0.475549688	-2.264344436	0.944316419
CSRP3	-0.09322197	3.789765513	-2.789833969	0.005524587	0.475549688	-2.266787066	0.937426855
FAM76A	0.192829683	5.838639897	2.786725203	0.005576828	0.475549688	-2.274396397	1.14300339
MAST3	0.111298041	7.84166978	2.785556641	0.005596581	0.475549688	-2.277254584	1.080199691
DDX10	-0.115954119	5.440174294	-2.78467183	0.005611579	0.475549688	-2.279417981	0.922771838
IFITM2	0.086539796	13.59744204	2.784365843	0.005616774	0.475549688	-2.280165979	1.061820423
WDR26	-0.207272995	5.730940934	-2.783567037	0.005630357	0.475549688	-2.282118319	0.866172938
BEST1	0.112533018	5.891336099	2.781296366	0.00566913	0.475549688	-2.287665075	1.08112476
OVOL2	-0.083164437	4.107452387	-2.780843486	0.005676893	0.475549688	-2.288770844	0.943984818
S1PR4	0.085124054	8.752742657	2.779143246	0.00570612	0.475549688	-2.292920673	1.060778952
SERPINA1	0.128989981	10.57758448	2.778255223	0.005721439	0.475549688	-2.295087132	1.093527863
KIF2B	-0.070073866	2.869545303	-2.777052094	0.005742253	0.475549688	-2.298021278	0.952589224
TLE3	0.145226964	8.024020729	2.776642736	0.005749351	0.475549688	-2.299019327	1.10590462
YPEL3	0.135715908	7.591675042	2.775818209	0.005763671	0.475549688	-2.301029164	1.098637855
SLPI	0.178212314	7.236566529	2.77532594	0.005772236	0.475549688	-2.302228831	1.131480964
IL17RA	0.117709134	9.096106936	2.774930727	0.00577912	0.475549688	-2.303191822	1.085010598
FAM167A	-0.093070617	4.863842802	-2.770189093	0.005862301	0.478374459	-2.31473522	0.937525206
DEF8	0.100457017	9.723320759	2.770043875	0.005864866	0.478374459	-2.315088451	1.072113033
ROPN1L	0.15118687	6.67245646	2.766468621	0.005928325	0.478374459	-2.323779374	1.110482663
GLT1D1	0.116568307	9.482104746	2.765739566	0.005941341	0.478374459	-2.325550279	1.084152953
SPINK2	-0.101215575	4.627845913	-2.765208843	0.005950833	0.478374459	-2.326839146	0.932247175
BAIAP2L1	-0.100725643	4.531085156	-2.761288618	0.006021369	0.478374459	-2.336352117	0.932563815
FES	0.105470571	7.095424869	2.759713718	0.006049919	0.478374459	-2.340170189	1.075845247
PP7080	-0.091132186	5.205363427	-2.758132069	0.006078713	0.478374459	-2.344002519	0.938785727
FLT4	0.09169797	3.352559922	2.754976334	0.006136536	0.478374459	-2.351642562	1.065623623
TGFB1	0.107023139	8.944626345	2.753070493	0.006171697	0.478374459	-2.356252544	1.07700365
MMP25	0.138244448	9.583056904	2.751175959	0.00620683	0.478374459	-2.360832144	1.100565072
BTBD17	-0.084828689	3.855655921	-2.750044547	0.006227898	0.478374459	-2.36356563	0.942896492
KATNB1	0.086790388	5.065737951	2.748302591	0.00626046	0.478374459	-2.367772079	1.062004875
NADK	0.118498952	6.499707306	2.747587205	0.006273877	0.478374459	-2.369498843	1.08560476
SLC25A20	0.12543827	6.55473294	2.742109206	0.006377482	0.478374459	-2.382707072	1.090839064
CENPBD1P1	0.13993465	6.518831991	2.740272582	0.006412563	0.478374459	-2.387129771	1.101855203
CLCN2	-0.091138982	4.781674931	-2.738706685	0.00644261	0.478374459	-2.390898297	0.938781305
PMF1	0.096151891	7.593612818	2.737467218	0.006466483	0.478374459	-2.393879765	1.068918524
MICAL2	0.135607859	6.887376954	2.736423558	0.006486647	0.478374459	-2.396389225	1.098555577
FGR	0.098060966	9.226373999	2.736094016	0.006493025	0.478374459	-2.397181411	1.070333928
NLRP12	0.119806453	7.546669979	2.735220044	0.006509969	0.478374459	-2.399281911	1.08658908
ACYP2	-0.110223448	4.774332689	-2.734139452	0.006530975	0.478374459	-2.401878112	0.926444561
KLF13	0.127922469	7.073904263	2.73398558	0.006533971	0.478374459	-2.402247719	1.092719015
RANBP17	-0.080132166	3.254581002	-2.731395483	0.006584588	0.478374459	-2.408466266	0.945970982
MVP	0.094637109	8.920430657	2.729801854	0.006615908	0.478374459	-2.412289592	1.067796784
OSBP2	-0.200023653	7.573614158	-2.728770883	0.006636241	0.478374459	-2.414761884	0.870536291
PILRA	0.121929366	9.820159466	2.728459074	0.006642402	0.478374459	-2.415509432	1.088189163
TTC27	-0.118829551	5.258154848	-2.728103229	0.006649439	0.478374459	-2.416362456	0.920934496
PLCD4	0.087740808	3.227344239	2.72750343	0.006661316	0.478374459	-2.417800037	1.062704734
FFAR2	0.173804469	8.832693022	2.727059828	0.006670112	0.478374459	-2.418863056	1.128029243
NUP214	0.102128691	8.852746457	2.725992779	0.006691313	0.478374459	-2.421419382	1.073356028
ZNF343	-0.078016395	4.790313186	-2.724920582	0.006712678	0.478374459	-2.423987072	0.947359304
GRK6	0.087910534	7.756997412	2.724531803	0.00672044	0.478374459	-2.424917879	1.062829763
CHST15	0.126112919	10.39352661	2.723312519	0.006744836	0.478374459	-2.427836235	1.091349293
TAGLN	0.179921228	5.600102471	2.722255704	0.006766046	0.478374459	-2.430364708	1.132822031
FLOT2	0.159892013	7.159065662	2.721862215	0.006773959	0.478374459	-2.431305904	1.117203511
CYGB	0.085811444	6.031625285	2.721101375	0.006789282	0.478374459	-2.43312541	1.061284493
SPTB	-0.158186518	6.350760206	-2.720013911	0.006811237	0.478374459	-2.435725168	0.896150834
NCF4	0.152482967	10.28360996	2.71908972	0.006829947	0.478374459	-2.437933814	1.111480753
RDH5	0.115739308	6.077182657	2.718987589	0.006832017	0.478374459	-2.438177844	1.083530158
LINC00877	0.156373376	6.347402373	2.718770695	0.006836416	0.478374459	-2.438696056	1.114482047
GNA14-AS1	-0.079796262	2.91421002	-2.716313233	0.006886433	0.479150375	-2.444564766	0.946191259
CCNI	0.167216968	5.054632978	2.715101026	0.006911227	0.479150375	-2.447457783	1.122890282
LINC00565	-0.093650716	5.33017965	-2.714552285	0.006922477	0.479150375	-2.448766984	0.937148308
UBE3D	-0.072699494	2.89031872	-2.709325638	0.007030462	0.484148199	-2.461224125	0.950857139
PPP1R13L	-0.094070877	4.597906077	-2.70838472	0.007050062	0.484148199	-2.46346425	0.936875419
SFRP5	-0.087182065	4.604611112	-2.707409108	0.007070437	0.484148199	-2.465786186	0.94135966
INO80D	0.222205786	3.36178176	2.705633878	0.007107648	0.484721642	-2.470009137	1.166515749
NAGK	0.113610324	9.990522768	2.704250549	0.007136766	0.484721642	-2.473297981	1.081932372
LINC00242	-0.078452069	3.225687433	-2.702536265	0.007173	0.484721642	-2.477371426	0.947073258
IFNGR2	0.112984595	9.620624952	2.702208922	0.007179938	0.484721642	-2.478148968	1.081463216
ARAP1	0.087226398	7.717073199	2.700316447	0.007220165	0.485727117	-2.48264242	1.062325881
CYTH4	0.104664888	6.462790812	2.699005848	0.007248143	0.485904353	-2.485752507	1.075244602
CEBPA	0.115364314	7.0418186	2.696672414	0.007298197	0.487555173	-2.491286219	1.083248557
TBC1D22B	-0.131479089	3.914675512	-2.692292004	0.007393002	0.49217373	-2.501661892	0.912895046
JPT1	0.112530885	8.211422391	2.691046208	0.007420167	0.492272872	-2.504609792	1.081123162
CXorf21	0.127514486	6.164853623	2.684599238	0.007562184	0.497701895	-2.519844168	1.092410046
CHMP2A	0.10059126	9.368235666	2.683403009	0.007588802	0.497701895	-2.522667027	1.072212798
PTOV1-AS1	-0.101233111	3.677886764	-2.681560349	0.00762997	0.497701895	-2.527012971	0.932235843
PPCDC	0.121245358	7.045682495	2.679906551	0.00766709	0.497701895	-2.530911036	1.087673355
REM2	0.122098774	6.539568214	2.679540696	0.007675323	0.497701895	-2.531773059	1.08831695
MKRN1	-0.166528961	10.12894366	-2.678585565	0.007696856	0.497701895	-2.534022991	0.890983759
NOSTRIN	-0.065836027	2.570849348	-2.677594307	0.00771926	0.497701895	-2.536357212	0.955391517
NTAN1	-0.10988367	7.08223579	-2.674422341	0.007791348	0.497701895	-2.543820992	0.926662779
SULT1A1	0.137269013	9.516352595	2.673492576	0.007812593	0.497701895	-2.546007158	1.099821209
FCGRT	0.09235346	9.165027567	2.672439804	0.007836711	0.497701895	-2.548481673	1.0661079
UTP15	-0.104263341	3.082945305	-2.670820393	0.007873941	0.497701895	-2.552286226	0.930279834
SIRT2	0.121358672	5.254368495	2.669964816	0.007893675	0.497701895	-2.554295379	1.087758787
SRA1	0.084782965	7.895268538	2.669525391	0.007903828	0.497701895	-2.555327039	1.060528186
RPS6KA1	0.091408812	8.761792046	2.669285303	0.00790938	0.497701895	-2.555890636	1.065410063
ZNF814	0.148276382	3.073342087	2.669267529	0.007909791	0.497701895	-2.555932359	1.108244638
RAB1B	0.068029582	8.909307115	2.667708421	0.007945933	0.497701895	-2.559591099	1.04828397
EML6	-0.085986487	3.563255045	-2.667398069	0.007953145	0.497701895	-2.560319152	0.942140098
ADGRD1	-0.07849616	2.904813072	-2.665902471	0.007987982	0.497701895	-2.563826529	0.947044315
RAB3IP	-0.123798057	4.099099798	-2.663698718	0.008039564	0.497701895	-2.568991181	0.917768339
CDKL1	-0.118394658	4.086405051	-2.66336948	0.008047296	0.497701895	-2.569762421	0.921212149
TNFRSF14-AS1	0.086379852	6.295886891	2.662553083	0.008066497	0.497701895	-2.571674433	1.061702712
FPR1	0.173699398	6.967734265	2.661849257	0.008083084	0.497701895	-2.573322352	1.127947092
ANK1	-0.181441249	5.585555811	-2.66071045	0.008109987	0.497701895	-2.575987837	0.881821618
TUBA1C	0.080246947	11.08750068	2.660076246	0.008125004	0.497701895	-2.577471774	1.057198986
RND1	-0.074656451	6.002638413	-2.655796343	0.008227	0.502344841	-2.58747718	0.949568215
HRCT1	-0.069263938	4.585862712	-2.65416169	0.008266259	0.502627335	-2.591294524	0.953124157
TRAPPC1	0.095687163	9.481367477	2.652944222	0.008295608	0.502627335	-2.594136162	1.068574254
PTPN6	0.086339358	10.4726943	2.650772969	0.008348182	0.502627335	-2.599200877	1.061672911
TTC25	-0.142103944	3.890582072	-2.650516739	0.008354405	0.502627335	-2.599798303	0.906196646
SPA17	-0.060317162	2.462836098	-2.649263657	0.008384903	0.502627335	-2.602719182	0.959053258
DEDD2	0.078062972	8.927016788	2.647748601	0.00842191	0.502627335	-2.606248939	1.055599793
FKBP1A	0.116181199	8.112497175	2.64713829	0.008436859	0.502627335	-2.607670285	1.083862089
OLMALINC	-0.060498846	2.718035936	-2.646890837	0.008442927	0.502627335	-2.608246484	0.958932488
LINC01782	-0.080285119	3.591337796	-2.645887719	0.008467565	0.502627335	-2.610581739	0.945870696
TADA3	0.074869712	7.725636764	2.643755626	0.008520147	0.504116723	-2.615542412	1.053265913
HCG27	0.171659667	7.824347275	2.642738738	0.008545329	0.504116723	-2.617907016	1.12635349
SULT1A2	0.107907541	7.981065474	2.640262376	0.008606932	0.504116723	-2.623661729	1.077664078
NOTCH1	0.098951993	7.843156602	2.639755628	0.008619587	0.504116723	-2.624838697	1.070995184
GOLGA2	0.116631735	6.765657051	2.639574197	0.008624122	0.504116723	-2.625260035	1.084200618
TRIM16	-0.087805209	4.466232082	-2.637618506	0.008673141	0.505441138	-2.629799974	0.940953145
ARRB2	0.083078212	9.735666238	2.634110175	0.008761704	0.507889674	-2.637936093	1.059275759
ISG20	0.108099686	9.516628583	2.632065514	0.008813692	0.507889674	-2.642673029	1.077807616
LINC00886	-0.087162928	4.612013338	-2.632010002	0.008815107	0.507889674	-2.642801584	0.941372147
PPP3CB-AS1	-0.088385872	4.630179767	-2.631774412	0.008821116	0.507889674	-2.643347146	0.940574502
GALNS	0.081322209	7.397767916	2.6301179	0.00886347	0.508386518	-2.64718184	1.057987226
LAT2	0.099448539	9.683292037	2.628249765	0.008911453	0.508386518	-2.651503636	1.071363862
TTTY13	-0.074560175	2.994809707	-2.628184095	0.008913144	0.508386518	-2.651655504	0.949631585
INTS7	-0.106448978	3.307198125	-2.626909352	0.008946024	0.508386518	-2.654602763	0.928871557
EFCAB5	-0.074658316	2.675209326	-2.623346381	0.009038505	0.508386518	-2.662833199	0.949566987
SLC46A3	0.08888871	7.106978399	2.622800644	0.009052746	0.508386518	-2.664092898	1.063550627
FAM160B2	-0.07468932	5.459054978	-2.622401538	0.009063173	0.508386518	-2.665013976	0.949546581
ZBTB48	0.088672397	6.682018917	2.622329409	0.009065059	0.508386518	-2.665180424	1.063391173
ALDH8A1	-0.111895415	2.893233581	-2.622202113	0.009068387	0.508386518	-2.665474168	0.925371509
ANGPT2	-0.089841245	4.304771321	-2.619862934	0.009129749	0.510265016	-2.670869538	0.939626141
MYL4	-0.168309294	9.146737826	-2.618899804	0.009155123	0.510265016	-2.673089672	0.889884934
CORO1A	0.098637889	11.23462369	2.611229226	0.009359465	0.518039744	-2.690743246	1.070762032
MYO1F	0.092827423	10.64766468	2.610916264	0.009367889	0.518039744	-2.691462459	1.066458202
KRT1	-0.302966359	8.453695834	-2.610627245	0.009375674	0.518039744	-2.692126575	0.810584021
NEIL2	-0.093298283	5.216934472	-2.609410233	0.009408518	0.518360691	-2.694922282	0.93737727
BACE1	-0.084163207	5.843766442	-2.608388336	0.009436177	0.518394884	-2.697268804	0.943331529
CACNA1D	0.089291816	4.042743054	2.606441967	0.009489058	0.519022338	-2.701735684	1.063847837
TNFRSF10C	0.157754406	8.249631604	2.605976668	0.009501739	0.519022338	-2.702803063	1.115549403
MKRN3	0.061695182	3.398998677	2.602279235	0.009603047	0.523065987	-2.711278303	1.043691389
RAD54B	-0.072568483	2.675594126	-2.598357907	0.009711546	0.52606759	-2.720254086	0.95094349
PRRG3	-0.083961898	3.981843594	-2.598304527	0.00971303	0.52606759	-2.72037618	0.943463168
ADGRV1	-0.070883835	4.182070115	-2.596336468	0.009767904	0.527549343	-2.724875995	0.952054564
LOC101927044	-0.069378242	3.151121841	-2.591775864	0.00989613	0.52910213	-2.735290837	0.953048644
HLA-C	0.090802977	11.25852676	2.59169883	0.009898309	0.52910213	-2.735466603	1.064962756
DENND2C	-0.076342484	3.64488915	-2.591395132	0.009906902	0.52910213	-2.7361595	0.948459132
SWT1	-0.091147988	5.002156551	-2.591153971	0.009913731	0.52910213	-2.736709659	0.938775445
TRIM58	-0.2459839	7.818516606	-2.590416657	0.009934636	0.52910213	-2.738391382	0.84324052
