# Supplementary material for: Genetic networks in Parkinson’s and Alzheimer’s disease
Source: Aging (Albany NY). 2020 Mar 23;12(6):5221–43. doi: 10.18632/aging.102943 (PMC7138567; doi:10.18632/aging.102943)
Supplement: Supplementary Table 4 [file aging-12-102943-s001..xlsx]

## Sheet: Sheet1
Module	Gene	Hub detection method	Score	P-value
AD modules
Blue	TARM1	Betweenness; Closeness	8087; 0.01321	0.000; 0.001
	GPRACR	Kleinberg’s centrality; PageRank; MM	0.04680; 0.00133; 0.70116	0.000; 0.003; 0.000
	LINC01122	Closeness; Betweenness	0.01357; 9575	0.000; 0.003
	DNAJB4	Betweenness; Closeness	6040; 0.01296	0.001; 0.008
	MDFI	PageRank; Kleinberg’s centrality; MM	0.00133; 0.04662; 0.69908	0.001; 0.001; 0.001
	TRPC5	PageRank; Kleinberg’s centrality; MM	0.00133; 0.04646; 0.69609	0.001; 0.002; 0.004
	UXS1	MM; Kleinberg’s centrality; PageRank	0.66258; 0.04457; 0.00128	0.001; 0.005; 0.006
	GRIP2	Betweenness; Closeness	11154; 0.01304	0.002; 0.009
	BLNK	Closeness; Betweenness	0.01333; 6775	0.002; 0.007
	TACR2	Betweenness; Closeness	7150; 0.01312	0.003; 0.003
	LHFPL1	MM; PageRank; Kleinberg’s centrality	0.65754; 0.00128; 0.04443	0.003; 0.006; 0.007
	USP18	Betweenness	6055	0.004
	MRAP2	Closeness; Betweenness	0.01294; 4184	0.004; 0.007
	LY6G6C	Kleinberg’s centrality; PageRank; MM	0.04587; 0.00131; 0.68542	0.004; 0.004; 0.005
	LSR	Kleinberg’s centrality; MM	0.04445; 0.65775	0.004; 0.009
	WDR90	PageRank; MM; Kleinberg’s centrality	0.00129; 0.66619; 0.04486	0.004; 0.006; 0.007
	LINC01547	PageRank; Kleinberg’s centrality	0.00127; 0.04422	0.004; 0.007
	TYMSOS	Closeness	0.01288	0.005
	BRAP	Kleinberg’s centrality	0.04389	0.005
	B4GALT2	MM; Kleinberg’s centrality; PageRank	0.66218; 0.04463; 0.00128	0.005; 0.007; 0.008
	CCER1	Betweenness; Closeness	4412; 0.01296	0.006; 0.007
	ST8SIA5	Betweenness; Closeness	4355; 0.01289	0.007; 0.007
	HERC2P2	Betweenness	4157	0.007
	PTPN5	Kleinberg’s centrality	0.04384	0.007
	TIMM13	PageRank	0.00126	0.007
	ZNF829	Closeness	0.0131	0.008
	ICAM1	Kleinberg’s centrality; MM	0.04369; 0.64437	0.008; 0.009
	FOXH1	Betweenness	3872	0.009
	MYMK	Closeness	0.01271	0.009
MCI modules
Sienna3	OR10A7	Betweenness; Closeness	2938; 0.01844	0.000; 0.001
	UXS1	MM; Kleinberg’s centrality; PageRank	0.58467; 0.04861; 0.00168	0.000; 0.001; 0.001
	UGT2B11	Closeness; Betweenness	0.01834; 2433	0.000; 0.003
	ADPRH	PageRank; MM; Kleinberg’s centrality	0.00166; 0.57500; 0.04805	0.001; 0.003; 0.005
	RBMS3	Betweenness; Closeness	2780; 0.01796	0.001; 0.007
	COL12A1	PageRank; Kleinberg’s centrality; MM	0.00166; 0.04801; 0.57814	0.002; 0.004; 0.006
	TRPC5	PageRank; MM	0.00164; 0.56563	0.003; 0.007
	OR4A16	Betweenness	2210	0.004
	LRRC59	Closeness; Betweenness	0.01808; 1851	0.004; 0.009
	MIR99AHG	Betweenness	1873	0.005
	MUC16	Closeness; Betweenness	0.01778; 1858	0.005; 0.006
	TXN2	PageRank; Kleinberg’s centrality	0.00165; 0.04788	0.005; 0.007
	ANKRD35	PageRank; Kleinberg’s centrality	0.00162; 0.04706	0.006; 0.008
	CBARP	PageRank; MM	0.00164; 0.56376	0.006; 0.009
	ERLIN1	Kleinberg’s centrality	0.04537	0.007
	MDFI	Kleinberg’s centrality; PageRank	0.00162; 0.04673	0.007; 0.008
	CFAP47	Kleinberg’s centrality	0.04686	0.008
	ZNF624	PageRank	0.00162	0.008
	CYP26B1	Closeness	0.0179	0.008
	PPP1R14D	Betweenness	1851	0.009
	HEPACAM	Betweenness	1856	0.009
HC modules
Darkolivegreen	LOC150051	Kleinberg’s centrality; PageRank; MM	0.06961; 0.00266; 0.63584	0.000; 0.000; 0.000
	TUBA3E	Betweenness; Closeness	3142; 0.08073	0.001; 0.006
	SYN1	Betweenness; Closeness	4572; 0.08297	0.001; 0.006
	BRMS1L	Kleinberg’s centrality; MM; PageRank	0.06801; 0.62877; 0.00262	0.003; 0.003; 0.006
	DEFB123	Kleinberg’s centrality; PageRank; MM	0.06542; 0.00255; 0.60318	0.003; 0.006; 0.008
	FAM81B	Closeness; Betweenness	0.08489; 2573	0.003; 0.009
	C6	Closeness; Betweenness	0.08390; 2995	0.004; 0.005
	VN1R2	Kleinberg’s centrality; PageRank; MM	0.06545; 0.00253; 0.60514	0.004; 0.005; 0.009
	ENKUR	Kleinberg’s centralityv; MM	0.06562; 0.59780	0.004; 0.007
	EFCAB1	Closeness	0.08297	0.006
	TCTEX1D4	Closeness	0.08121	0.006
	SCG3	Betweenness	2657	0.007
	OR5AS1	PageRank	0.00253	0.007
	YIPF5	Closeness	0.08046	0.009
Darkorange2	AP5Z1	PageRank; MM; Kleinberg’s centrality	0.00635; 0.67903; 0.10642	0.001; 0.003; 0.009
	MED18	Closeness; Betweenness	0.17321; 1833	0.003; 0.004
	NHLRC4	Closeness	0.16515	0.004
	NEK8	PageRank	0.00592	0.005
	ZNF585A	PageRank; Kleinberg’s centrality	0.00608; 0.10271	0.006; 0.009
	CHEK1	Betweenness	1277	0.009
Skyblue	IL1RL1	Betweenness	1595	0.004
	ADRA1A	Closeness; Betweenness	0.24625; 1276	0.005; 0.007
	RBM5	MM; PageRank	0.87355; 0.01192	0.006; 0.007
Red	CHST11	Betweenness; Closeness	5964; 0.06598	0.000; 0.002
	PLK3	PageRank; MM; Kleinberg’s centrality	0.00225; 0.65033; 0.06427	0.001; 0.001; 0.002
	CPEB2	MM; Kleinberg’s centrality; PageRank	0.63587; 0.06243; 0.00219	0.001; 0.002; 0.002
	PNMA8A	Betweenness; Closeness	5555; 0.06434	0.001; 0.008
	ZFY	Closeness	0.06577	0.002
	IGFBPL1	MM; PageRank; Kleinberg’s centrality	0.62685; 0.00216; 0.06143	0.002; 0.003; 0.004
	LINC01623	Closeness; Betweenness	0.06630; 3297	0.002; 0.004
	PLXND1	Kleinberg’s centrality; MM; PageRank	0.06357; 0.64174; 0.00222	0.003; 0.004; 0.006
	WFDC13	Betweenness	3644	0.005
	CD200R1L	Closeness	0.06528	0.005
	VGLL2	Closeness; Betweenness	0.06555; 3580	0.005; 0.008
	SLC28A1	PageRank; MM	0.00214; 0.61949	0.006; 0.008
	SKA1	Betweenness	3161	0.007
	ABCA9	Betweenness	4142	0.007
	KREMEN2	Closeness	0.06402	0.008
	SNF8	MM; Kleinberg’s centrality	0.61736; 0.06063	0.008; 0.009
	TXN2	PageRank	0.00214	0.009
	FBXO42	PageRank	0.00209	0.009
	KIF2C	Closeness	0.06184	0.009
